# Supplementary material for: A novel fast vector method for genetic sequence comparison
Source: PubMed Central journal article supplement (PMC5610321; doi:10.1038/s41598-017-12493-2), 2017-09-22

# A novel fast vector method for genetic sequence comparison

Yongkun Li<sup>1</sup>, Lily He<sup>1</sup>, Rong Lucy He<sup>2</sup> and Stephen S.-T. Yau<sup>1,\*</sup>

<sup>1</sup> Department of Mathematical Sciences, Tsinghua University, Beijing, 100084, PR China

<sup>2</sup> Department of Biological Sciences, Chicago State University, Chicago, Illinois, USA

\* To whom correspondence should be addressed. Tel: +86 010 62787874; Email: yau@uic.edu

**Table S1. Information of the 41 mammalian genomes**

| <b>Accession Number</b> | <b>Abbreviation</b> | <b>Description</b> | <b>Genome Length<br/>(bp)</b> |
|-------------------------|---------------------|--------------------|-------------------------------|
| V00662                  | Human               | Human              | 16569                         |
| D38116                  | Pig_Chim            | Pigmy chimpanzee   | 16563                         |
| D38113                  | Com_Chim            | Common chimpanzee  | 16554                         |
| D38114                  | Gorilla             | Gorilla            | 16472                         |
| X99256                  | Gibbon              | Gibbon             | 16521                         |
| Y18001                  | Baboon              | Baboon             | 16389                         |
| AY863426                | Ver_Monkey          | Vervet monkey      | 16586                         |
| D38115                  | Bor_Oran            | Bornean orangutan  | 16389                         |
| NC_002083               | Sum_Oran            | Sumatran orangutan | 16499                         |
| U20753                  | Cat                 | Cat                | 16364                         |
| U96639                  | Dog                 | Dog                | 17009                         |
| AJ002189                | Pig                 | Pig                | 16727                         |
| AF010406                | Sheep               | Sheep              | 16680                         |
| AF533441                | Goat                | Goat               | 16616                         |
| V00654                  | Cow                 | Cow                | 16640                         |
| AY488491                | Buffalo             | Buffalo            | 16338                         |
| EU442884                | Wolf                | Wolf               | 16355                         |
| EF551003                | Tiger               | Tiger              | 16774                         |
| EF551002                | Leopard             | Leopard            | 16990                         |
| X97336                  | Indian_Rhino        | Indian Rhinoceros  | 16964                         |
| Y07726                  | White_Rhino         | White Rhinoceros   | 16829                         |
| DQ402478                | Black_Bear          | Black Bear         | 16832                         |
| AF303110                | Brown_Bear          | Brown Bear         | 16868                         |
| AF303111                | Polar_Bear          | Polar Bear         | 17020                         |
| EF212882                | Giant_Panda         | Giant Panda        | 17017                         |
| AJ001588                | Rabbit              | Rabbit             | 16805                         |
| X88898                  | Hedgehog            | Hedgehog           | 17245                         |
| NC_002764               | Macaca_Thibet       | Macaca Thibet      | 17447                         |
| AJ238588                | Squirrel            | Squirrel           | 16602                         |
| AJ001562                | Dormouse            | Dormouse           | 16507                         |
| X72204                  | Blue_Whale          | Blue whale         | 16402                         |
| NC_005268               | Bowhead Whale       | Bowhead Whale      | 16390                         |
| NC_007441               | chiru               | chiru              | 16498                         |
| NC_008830               | Common warthog      | Common warthog     | 16719                         |
| NC_001788               | donkey              | donkey             | 16670                         |
| NC_001321               | Fin Whale           | Fin Whale          | 16398                         |

|           |                           |                           |       |
|-----------|---------------------------|---------------------------|-------|
| NC_005270 | Gray Whale                | Gray Whale                | 16412 |
| NC_001640 | horse                     | horse                     | 16660 |
| NC_005275 | Indus River Dolphin       | Indus River Dolphin       | 16324 |
| NC_006931 | North Pacific Right Whale | North Pacific Right Whale | 16386 |
| NC_010640 | Taiwan serow              | Taiwan serow              | 16524 |

**Table S2. Information of the 38 Influenza A viruses**

| <b>Accession Number</b> | <b>Description</b>                                           | <b>Length (bp)</b> |
|-------------------------|--------------------------------------------------------------|--------------------|
| HM370969                | A/turkey/Ontario/FAV110-4/2009(H1N1)                         | 1419               |
| CY138562                | A/mallard/Nova Scotia/00088/2010(H1N1)                       | 1422               |
| CY149630                | A/thick-billed murre/Canada/1871/2011(H1N1)                  | 1433               |
| KC608160                | A/duck/Guangxi/030D/2009(H1N1)                               | 1398               |
| AM157358                | A/mallard/France/691/2002(H1N1)                              | 1413               |
| AB470663                | A/duck/Hokkaido/w73/2007(H1N1)                               | 1422               |
| AB546159                | A/pintail/Miyagi/1472/2008(H1N1)                             | 1410               |
| HQ897966                | A/mallard/Korea/KNU YP09/2009(H1N1)                          | 1410               |
| EU026046                | A/mallard/Maryland/352/2002(H1N1)                            | 1433               |
| FJ357114                | A/mallard/Maryland/26/2003(H1N1)                             | 1433               |
| GQ411894                | A/dunlin/Alaska/44421-660/2008(H1N1)                         | 1413               |
| CY140047                | A/mallard/Minnesota/Sg-00620/2008(H1N1)                      | 1433               |
| KM244078                | A/turkey/Virginia/4135/2014(H1N1)                            | 1410               |
| HQ185381                | A/chicken/Eastern China/XH222/2008(H5N1)                     | 1350               |
| HQ185383                | A/duck/Eastern China/JS017/2009(H5N1)                        | 1350               |
| EU635875                | A/chicken/Yunnan/chuxiong01/2005(H5N1)                       | 1350               |
| FM177121                | A/chicken/Germany/R3234/2007(H5N1)                           | 1370               |
| AM914017                | A/domestic duck/Germany/R1772/2007(H5N1)                     | 1350               |
| KF572435                | A/wild bird/Hong Kong/07035-1/2011(H5N1)                     | 1350               |
| AF509102                | A/Chicken/Hong Kong/822.1/01 (H5N1)                          | 1366               |
| AB684161                | A/chicken/Miyazaki/10/2011(H5N1)                             | 1350               |
| EF541464                | A/chicken/Korea/es/2003(H5N1)                                | 1350               |
| JF699677                | A/mandarin duck/Korea/K10-483/2010(H5N1)                     | 1350               |
| GU186511                | A/turkey/VA/505477-18/2007(H5N1)                             | 1370               |
| EU500854                | A/American black duck/NB/2538/2007(H7N3)                     | 1453               |
| CY129336                | A/American black duck/New Brunswick/02490/2007(H7N3)         | 1428               |
| CY076231                | A/American green-winged teal/California/44242-906/2007(H7N3) | 1420               |
| CY039321                | A/avian/Delaware Bay/226/2006(H7N3)                          | 1434               |
| AY646080                | A/chicken/British Columbia/GSC_human_B/04(H7N3)              | 1453               |
| KF259734                | A/chicken/Rizhao/713/2013(H7N9)                              | 1398               |
| KF938945                | A/chicken/Jiangsu/1021/2013(H7N9)                            | 1404               |
| KF259688                | A/duck/Jiangxi/3096/2009(H7N9)                               | 1413               |
| KC609801                | A/wild duck/Korea/SH19-47/2010(H7N9)                         | 1426               |
| CY014788                | A/turkey/Minnesota/1/1988(H7N9)                              | 1460               |
| CY186004                | A/mallard/Minnesota/AI09-3770/2009(H7N9)                     | 1422               |
| DQ017487                | A/mallard/Postdam/178-4/1983(H2N2)                           | 1467               |
| CY005540                | A/duck/Hong Kong/319/1978(H2N2)                              | 1467               |
| JX081142                | A/emperor goose/Alaska/44297-260/2007(H2N2)                  | 1457               |

**Table S3. Information of 113 human rhinovirus genomes and three outgroup genomes**

| <b>Accession Number</b> | <b>Abbreviation</b> | <b>Length (bp)</b> |
|-------------------------|---------------------|--------------------|
| AF499637                | HEV_cva-13*         | 7458               |
| AF546702                | HEV_cva-21*         | 7406               |
| AY751783                | A_hrv-39*           | 7137               |
| DQ473485                | B_hrv-03*           | 7208               |
| DQ473486                | B_hrv-06*           | 7216               |
| DQ473488                | B_hrv-48*           | 7214               |
| DQ473489                | B_hrv-70*           | 7223               |
| DQ473490                | B_hrv-04*           | 7212               |
| DQ473491                | A_hrv-41*           | 7145               |
| DQ473492                | A_hrv-73*           | 7140               |
| DQ473493                | A_hrv-15*           | 7134               |
| DQ473494                | A_hrv-74*           | 7120               |
| DQ473496                | A_hrv-49*           | 7106               |
| DQ473497                | A_hrv-23*           | 7025               |
| DQ473499                | A_hrv-44*           | 7123               |
| DQ473500                | A_hrv-59*           | 7135               |
| DQ473504                | A_hrv-88*           | 7143               |
| DQ473505                | A_hrv-36*           | 7141               |
| DQ473506                | A_hrv-46*           | 7149               |
| DQ473507                | A_hrv-53*           | 7143               |
| DQ473508                | A_hrv-28*           | 7148               |
| DQ473510                | A_hrv-75*           | 7137               |
| DQ473511                | A_hrv-55*           | 7036               |
| EF077279                | C_nat001*           | 6944               |
| EF077280                | C_nat045*           | 7015               |
| EF173414                | A_hrv-11*           | 7125               |
| EF173415                | A_hrv-12*           | 7124               |
| EF173420                | B_hrv-17*           | 7219               |
| EF173423                | B_hrv-37*           | 7216               |
| EF173425                | B_hrv-93*           | 7215               |
| EF186077                | C_qpm*              | 7134               |
| EF582385                | C_c024*             | 7099               |
| EF582386                | C_c025*             | 7114               |
| EF582387                | C_c026*             | 7086               |
| FJ445111                | A_hrv-01            | 7137               |
| FJ445112                | B_hrv-05            | 7212               |
| FJ445113                | A_hrv-08            | 7108               |
| FJ445114                | A_hrv-09-f01        | 7134               |
| FJ445115                | A_hrv-09-f02        | 7133               |
| FJ445116                | A_hrv-13            | 7140               |
| FJ445117                | A_hrv-13-f03        | 7143               |
| FJ445118                | A_hrv-18            | 7119               |
| FJ445119                | A_hrv-19            | 7135               |
| FJ445121                | A_hrv-21            | 7134               |
| FJ445122                | A_hrv-22            | 7129               |
| FJ445123                | A_hrv-25            | 7126               |
| FJ445124                | B_hrv-26            | 7211               |
| FJ445125                | A_hrv-29            | 7123               |
| FJ445126                | A_hrv-31            | 7131               |
| FJ445127                | A_hrv-32            | 7133               |
| FJ445128                | A_hrv-33            | 7133               |
| FJ445129                | A_hrv-40            | 7138               |

|          |              |      |
|----------|--------------|------|
| FJ445130 | B_hrv-42     | 7223 |
| FJ445131 | A_hrv-43     | 7129 |
| FJ445132 | A_hrv-45     | 7114 |
| FJ445133 | A_hrv-47     | 7132 |
| FJ445134 | A_hrv-49-f04 | 7109 |
| FJ445135 | A_hrv-50     | 7118 |
| FJ445136 | A_hrv-51     | 7152 |
| FJ445137 | B_hrv-52-f10 | 7216 |
| FJ445138 | A_hrv-54     | 7134 |
| FJ445139 | A_hrv-54-f05 | 7133 |
| FJ445140 | A_hrv-56     | 7136 |
| FJ445141 | A_hrv-57     | 7134 |
| FJ445142 | A_hrv-58     | 7140 |
| FJ445143 | A_hrv-60     | 7139 |
| FJ445144 | A_hrv-61     | 7139 |
| FJ445145 | A_hrv-62     | 7131 |
| FJ445146 | A_hrv-63     | 7141 |
| FJ445147 | A_hrv-65     | 7162 |
| FJ445148 | A_hrv-66     | 7139 |
| FJ445149 | A_hrv-67     | 7135 |
| FJ445151 | B_hrv-69     | 7211 |
| FJ445152 | A_hrv-71     | 7161 |
| FJ445153 | B_hrv-72     | 7216 |
| FJ445154 | A_hrv-77     | 7136 |
| FJ445155 | B_hrv-79     | 7224 |
| FJ445156 | A_hrv-80     | 7138 |
| FJ445157 | A_hrv-81     | 7116 |
| FJ445158 | A_hrv-81-f06 | 7116 |
| FJ445159 | A_hrv-81-f07 | 7116 |
| FJ445160 | A_hrv-82     | 7123 |
| FJ445161 | B_hrv-83     | 7230 |
| FJ445162 | B_hrv-84     | 7201 |
| FJ445163 | A_hrv-85     | 7140 |
| FJ445164 | B_hrv-86     | 7213 |
| FJ445165 | A_hrv-89-f09 | 7150 |
| FJ445166 | A_hrv-89-f08 | 7152 |
| FJ445167 | A_hrv-90     | 7124 |
| FJ445168 | B_hrv-91     | 7221 |
| FJ445169 | B_hrv-92     | 7233 |
| FJ445170 | A_hrv-95     | 7110 |
| FJ445171 | A_hrv-96     | 7134 |
| FJ445172 | B_hrv-97     | 7207 |
| FJ445173 | A_hrv-98     | 7133 |
| FJ445174 | B_hrv-99     | 7208 |
| FJ445175 | A_hrv-100    | 7140 |
| FJ445176 | A_hrv-07     | 7146 |
| FJ445177 | A_hrv-09     | 7132 |
| FJ445178 | A_hrv-10     | 7137 |
| FJ445179 | A_hrv-30     | 7093 |
| FJ445180 | A_hrv-38     | 7136 |
| FJ445181 | A_hrv-64     | 7129 |
| FJ445182 | A_hrv-76     | 7128 |
| FJ445183 | A_hrv-78     | 7145 |
| FJ445184 | A_hrv-89     | 7152 |
| FJ445185 | A_hrv-94     | 7132 |
| FJ445186 | B_hrv-27     | 7217 |
| FJ445187 | B_hrv-35     | 7224 |
| FJ445188 | B_hrv-52     | 7216 |

|          |            |      |
|----------|------------|------|
| FJ445189 | A_hrv-34   | 7119 |
| FJ445190 | A_hrv-24   | 7132 |
| L05355   | B_hrv-14*  | 7212 |
| L24917   | A_hrv-16*  | 7124 |
| V01149   | HEV_pv-1m* | 7440 |
| X02316   | A_hrv-02*  | 7102 |

**Table S4. Accession number of 59 ebolaviruses**

| <b>Accession Number</b> | <b>Species</b>      | <b>Genome Length (bp)</b> |
|-------------------------|---------------------|---------------------------|
| FJ217161                | BDBV_2007_FJ217161  | 18941                     |
| KC545393                | BDBV_2012_KC545393  | 18940                     |
| KC545395                | BDBV_2012_KC545395  | 18939                     |
| KC545394                | BDBV_2012_KC545394  | 18938                     |
| KC545396                | BDBV_2012_KC545396  | 18937                     |
| FJ217162                | TAFV_1994_FJ217162  | 18936                     |
| AF522874                | RESTV_1990_AF522874 | 18935                     |
| AB050936                | RESTV_1996_AB050936 | 18934                     |
| JX477166                | RESTV_1996_JX477166 | 18933                     |
| FJ621585                | RESTV_2008_FJ621585 | 18932                     |
| FJ621583                | RESTV_2008_FJ621583 | 18931                     |
| JX477165                | RESTV_2009_JX477165 | 18930                     |
| FJ968794                | SUDV_1976_FJ968794  | 18929                     |
| KC242783                | SUDV_1979_KC242783  | 18928                     |
| EU338380                | SUDV_2004_EU338380  | 18927                     |
| AY729654                | SUDV_2000_AY729654  | 18926                     |
| JN638998                | SUDV_2011_JN638998  | 18925                     |
| KC545389                | SUDV_2012_KC545389  | 18924                     |
| KC545390                | SUDV_2012_KC545390  | 18923                     |
| KC545391                | SUDV_2012_KC545391  | 18922                     |
| KC545392                | SUDV_2012_KC545392  | 18921                     |
| KC589025                | SUDV_2012_KC589025  | 18920                     |
| KC242801                | EBOV_1976_KC242801  | 18919                     |

|           |                    |       |
|-----------|--------------------|-------|
| NC_002549 | EBOV_1976_NC002549 | 18918 |
| KC242791  | EBOV_1977_KC242791 | 18917 |
| KC242792  | EBOV_1994_KC242792 | 18916 |
| KC242793  | EBOV_1996_KC242793 | 18915 |
| KC242794  | EBOV_1996_KC242794 | 18914 |
| AY354458  | EBOV_1995_AY354458 | 18913 |
| KC242796  | EBOV_1995_KC242796 | 18912 |
| KC242799  | EBOV_1995_KC242799 | 18911 |
| KC242784  | EBOV_2007_KC242784 | 18910 |
| KC242786  | EBOV_2007_KC242786 | 18909 |
| KC242787  | EBOV_2007_KC242787 | 18908 |
| KC242789  | EBOV_2007_KC242789 | 18907 |
| KC242785  | EBOV_2007_KC242785 | 18906 |
| KC242790  | EBOV_2007_KC242790 | 18905 |
| KC242788  | EBOV_2007_KC242788 | 18904 |
| KC242800  | EBOV_2002_KC242800 | 18903 |
| KM034555  | EBOV_2014_G3676    | 18902 |
| KM034562  | EBOV_2014_G3686    | 18901 |
| KM233039  | EBOV_2014_EM112    | 18900 |
| KM034557  | EBOV_2014_G3677    | 18899 |
| KM034560  | EBOV_2014_G3682    | 18898 |
| KM233050  | EBOV_2014_G3713    | 18897 |
| KM233053  | EBOV_2014_G3724    | 18896 |
| KM233057  | EBOV_2014_G3735    | 18895 |
| KM233063  | EBOV_2014_G3764    | 18894 |
| KM233072  | EBOV_2014_G3782    | 18893 |
| KM233110  | EBOV_2014_G3848    | 18892 |
| KM233070  | EBOV_2014_G3770    | 18891 |
| KM233099  | EBOV_2014_G3825    | 18890 |

|          |                    |       |
|----------|--------------------|-------|
| KM233097 | EBOV_2014_G3823    | 18889 |
| KM233109 | EBOV_2014_G3846    | 18888 |
| KM233096 | EBOV_2014_G3822    | 18887 |
| KM233103 | EBOV_2014_G3831    | 18886 |
| KJ660346 | EBOV_2014_KJ660346 | 18885 |
| KJ660347 | EBOV_2014_KJ660347 | 18884 |
| KJ660348 | EBOV_2014_KJ660348 | 18883 |

**Table S5. Information of the 30 coronavirus genomes and the four outgroup genomes**

| <b>Accession Number</b> | <b>Abbreviation</b> | <b>Description</b>                                    | <b>Length (bp)</b> |
|-------------------------|---------------------|-------------------------------------------------------|--------------------|
| AF304460                | 1_HCoV-229E         | Human coronavirus 229E, Group 1                       | 27317              |
| AF353511                | 1_PEDV              | Porcine epidemic diarrhea virus strain, Group 1       | 28033              |
| NC_005831               | 1_HCoV-NL63         | Human coronavirus NL63, Group 1                       | 27553              |
| AY391777                | 2_HCoV-OC43         | Human coronavirus OC43, Group 2                       | 30738              |
| U00735                  | 2_BCoV              | Bovine coronavirus strain Mebus, Group 2              | 31032              |
| AF391542                | 2_BCoV-LUN          | Bovine coronavirus isolate BCoV-LUN, Group 2          | 31028              |
| AF220295                | 2_BCoV-Q            | Bovine coronavirus strain Quebec, Group 2             | 31100              |
| NC_003045               | 2_BCoV              | Bovine coronavirus, Group 2                           | 31028              |
| AF208067                | 2_MHV               | Murine hepatitis virus strain ML-10, Group 2          | 31233              |
| AF201929                | 2_MHV2              | Murine hepatitis virus strain 2, Group 2              | 31276              |
| AF208066                | 2_MHV-Penn          | Murine hepatitis virus strain Penn 97-1, Group 2      | 31112              |
| NC_001846               | 2_MHV               | Murine hepatitis virus, Group 2                       | 31357              |
| NC_001451               | 3_IBV               | Avian infectious bronchitis virus, Group 3            | 27608              |
| EU095850                | 3_TCoV              | Turkey coronavirus isolate MG10, Group 3              | 27657              |
| AY278488                | 4_BJ01              | SARS coronavirus BJ01, Group 4                        | 29725              |
| AY278741                | 4_Urbani            | SARS coronavirus Urbani, Group 4                      | 29727              |
| AY278491                | 4_HKU-39849         | SARS coronavirus HKU-39849, Group 4                   | 29742              |
| AY278554                | 4_CUHK-W1           | SARS coronavirus CUHK-W1, Group 4                     | 29736              |
| AY282752                | 4_CUHK-Su10         | SARS coronavirus CUHK-Su10, Group 4                   | 29736              |
| AY283794                | 4_SIN2500           | SARS coronavirus isolate SIN2500, Group 4             | 29711              |
| AY283795                | 4_SIN2677           | SARS coronavirus isolate SIN2677, Group 4             | 29705              |
| AY283796                | 4_SIN2679           | SARS coronavirus isolate SIN2679, Group 4             | 29711              |
| AY283797                | 4_SIN2748           | SARS coronavirus isolate SIN2748, Group 4             | 29706              |
| AY283798                | 4_SIN2774           | SARS coronavirus isolate SIN2774, Group 4             | 29711              |
| AY291451                | 4_TW1               | SARS coronavirus TW1, Group 4                         | 29729              |
| NC_004718               | 4_TOR2              | SARS coronavirus TOR2, Group 4                        | 29751              |
| AY297028                | 4_ZJ01              | SARS coronavirus ZJ01, Group 4                        | 29715              |
| AY572034                | 4_Civet007          | SARS coronavirus civet007, Group 4                    | 29540              |
| AY572035                | 4_Civet010          | SARS coronavirus civet010, Group 4                    | 29518              |
| NC_006577               | 5_HCoV-HKU1         | Human coronavirus HKU1, Group 5                       | 29926              |
| NC_001564               | out_CellF           | Cell fusing agent virus, <i>Flaviviridae</i> outgroup | 10695              |
| NC_004102               | out_HepaCF          | Hepatitis C virus, <i>Flaviviridae</i> outgroup       | 9646               |
| NC_001512               | out_NyongT          | O'nyong-nyong virus, <i>Togaviridae</i> outgroup      | 11835              |
| NC_001544               | out_RossT           | Ross River virus, <i>Togaviridae</i> outgroup         | 11657              |

**Table S6. Information of the 59 bacterial genomes**

| <b>Family</b>       | <b>Species</b>                        | <b>Accession number</b> | <b>Genome Length(bp)</b> |
|---------------------|---------------------------------------|-------------------------|--------------------------|
| Aeromonadaceae      | Aeromonas hydrophila strain AHNIH1    | NZ_CP016380.1           | 9172850                  |
|                     | Aeromonas hydrophila strain GYK1      | NZ_CP016392.1           | 9093803                  |
|                     | Aeromonas hydrophila YL17             | CP007518.2              | 8856662                  |
|                     | Aeromonas veronii strain AVNIH1       | NZ_CP014774.1           | 9014756                  |
|                     | Aeromonas veronii strain TH0426       | NZ_CP012504.1           | 8935709                  |
| Bacillaceae         | Bacillus anthracis str. A0248         | CP001598.1              | 4983359                  |
|                     | Bacillus anthracis str. A16R          | CP001974.1              | 8066192                  |
|                     | Bacillus anthracis str. Ames          | AE016879.1              | 5062406                  |
|                     | Bacillus anthracis str. CDC 684       | CP001215.1              | 5141453                  |
|                     | Bacillus anthracis str. H9401         | NC_017729.1             | 8145239                  |
|                     | Bacillus anthracis str. Sterne        | AE017225.1              | 5220500                  |
|                     | Bacillus cereus E33L                  | CP000001.1              | 8224286                  |
| Alcaligenaceae      | Bordetella bronchialis strain AU17976 | NZ_CP016171.1           | 9330944                  |
|                     | Bordetella bronchiseptica 253         | NC_019382.1             | 8777615                  |
|                     | Bordetella flabilis strain AU10664    | NZ_CP016172.1           | 9251897                  |
| Borreliaceae        | Borrelia duttonii Ly                  | CP000976.1              | 4904312                  |
|                     | Borrelia hermsii DAH                  | CP000048.1              | 5299547                  |
|                     | Borrelia recurrentis A1               | CP000993.1              | 5378594                  |
|                     | Borrelia turicatae 91E135             | CP000049.1              | 5457641                  |
| Caulobacteraceae    | Phenylobacterium zucineum HLK1        | CP000747.1              | 8619521                  |
|                     | Caulobacter crescentus CB15           | NC_002696.2             | 8540474                  |
|                     | Caulobacter crescentus NA1000         | NC_011916.1             | 8698568                  |
| Clostridiaceae      | Clostridium perfringens ATCC 13124    | CP000246.1              | 5536688                  |
|                     | Clostridium perfringens SM101         | CP000312.1              | 5615735                  |
|                     | Clostridium perfringens str. 13 DNA   | BA000016.3              | 5694782                  |
| Desulfovibrionaceae | Desulfovibrio vulgaris DP4            | CP000527.1              | 5773829                  |
|                     | Desulfovibrio vulgaris Hildenborough  | AE017285.1              | 5931923                  |



|                    |                                                             |             |         |
|--------------------|-------------------------------------------------------------|-------------|---------|
|                    | <i>Desulfovibrio vulgaris</i> RCH1                          | CP002297.1  | 5852876 |
| Erwiniaceae        | <i>Erwinia pyrifoliae</i> DSM 12163                         | FN392235.1  | 6010970 |
|                    | <i>Erwinia</i> sp. Ejp617                                   | CP002124.1  | 6090017 |
|                    | <i>Erwinia tasmaniensis</i> strain ET1-99                   | CU468135.1  | 6169064 |
| Lactobacillaceae   | <i>Lactobacillus acidophilus</i> NCFM                       | NC_006814.3 | 8303333 |
|                    | <i>Lactobacillus helveticus</i> DPC 4571                    | NC_010080.1 | 8382380 |
|                    | <i>Lactobacillus johnsonii</i> NCC 533                      | NC_005362.1 | 8461427 |
| Mycoplasmataceae   | <i>Mycoplasma agalactiae</i> PG2                            | CU179680.1  | 6485252 |
|                    | <i>Mycoplasma conjunctivae</i> HRC-581T                     | FM864216.2  | 6564299 |
|                    | <i>Mycoplasma fermentans</i> JER                            | CP001995.1  | 6643346 |
| Burkholderiaceae   | <i>Ralstonia eutropha</i> H16                               | AM260480.1  | 6722393 |
|                    | <i>Ralstonia eutropha</i> JMP134                            | CP000091.1  | 6801440 |
| Rhodobacteraceae   | <i>Rhodobacter sphaeroides</i> 2.4.1                        | CP000144.2  | 6880487 |
|                    | <i>Rhodobacter sphaeroides</i> ATCC 17029                   | CP000578.1  | 6959534 |
|                    | <i>Rhodobacter sphaeroides</i> KD131                        | CP001151.1  | 7038581 |
| Staphylococcaceae  | <i>Staphylococcus carnosus</i> subsp. <i>carnosus</i> TM300 | AM295250.1  | 7275722 |
|                    | <i>Staphylococcus epidermidis</i> ATCC 12228                | AE015929.1  | 7354769 |
|                    | <i>Staphylococcus epidermidis</i> RP62A                     | CP000029.1  | 7433816 |
|                    | <i>Staphylococcus haemolyticus</i> JCSC1435 DNA             | AP006716.1  | 7512863 |
|                    | <i>Staphylococcus lugdunensis</i> HKU09-01                  | CP001837.1  | 7591910 |
| Yersiniaceae       | <i>Yersinia pestis</i> Antiqua                              | CP000308.1  | 7670957 |
|                    | <i>Yersinia pestis</i> CO92                                 | AL590842.1  | 7750004 |
|                    | <i>Yersinia pestis</i> D106004                              | CP001585.1  | 7829051 |
|                    | <i>Yersinia pestis</i> KIM10+                               | AE009952.1  | 7908098 |
|                    | <i>Yersinia pestis</i> Z176003                              | CP001593.1  | 7987145 |
| Enterobacteriaceae | <i>Escherichia coli</i> ABU 83972                           | CP001671.1  | 6327158 |
|                    | <i>Escherichia coli</i> APEC O1                             | CP000468.1  | 6406205 |
|                    | <i>Escherichia coli</i> ATCC 8739                           | CP000946.1  | 4746218 |
|                    | <i>Escherichia coli</i> BL21                                | CP001665.1  | 6248111 |

|  |                               |            |         |
|--|-------------------------------|------------|---------|
|  | Shigella flexneri 2002017     | CP001383.1 | 7117628 |
|  | Shigella flexneri 2a str. 301 | AE005674.2 | 7196675 |
|  | Shigella sonnei Ss046         | CP000038.1 | 4825265 |

**Table S7. Information of the 9 mammalian X chromosomes**

| <b>Name</b>             | <b>Assembly accession</b> | <b>Length (Mb)</b> |
|-------------------------|---------------------------|--------------------|
| Chimpanzee X chromosome | GCF_000001515.6           | 135.9              |
| Human X chromosome      | GCF_000001405.25          | 151.1              |
| Monkey X chromosome     | GCF_000772875.2           | 145.7              |
| Gorilla X chromosome    | GCF_000151905.1           | 143.0              |
| Dog X chromosome        | GCF_000002285.3           | 123.2              |
| Horse X chromosome      | GCF_000002305.2           | 121.6              |
| Mouse X chromosome      | GCF_000001635.25          | 163.5              |
| Opossum X chromosome    | GCF_000002295.2           | 73.0               |
| Platypus X2 chromosome  | GCF_000002275.2           | 5.5                |

## Phylogenetic trees with the feature frequency profiles method

Figure S1. Phylogenetic tree of 41 mitochondrial genome sequences based on feature frequency profiles method using 7 mer. The 8 clusters are Primates (red), Cetacea (green), Artiodactyla (pink), Perissodactyla (light green), Rodentia (black), Lagomorpha (dark red), Carnivore (blue), and Erinaceomorpha (grey).

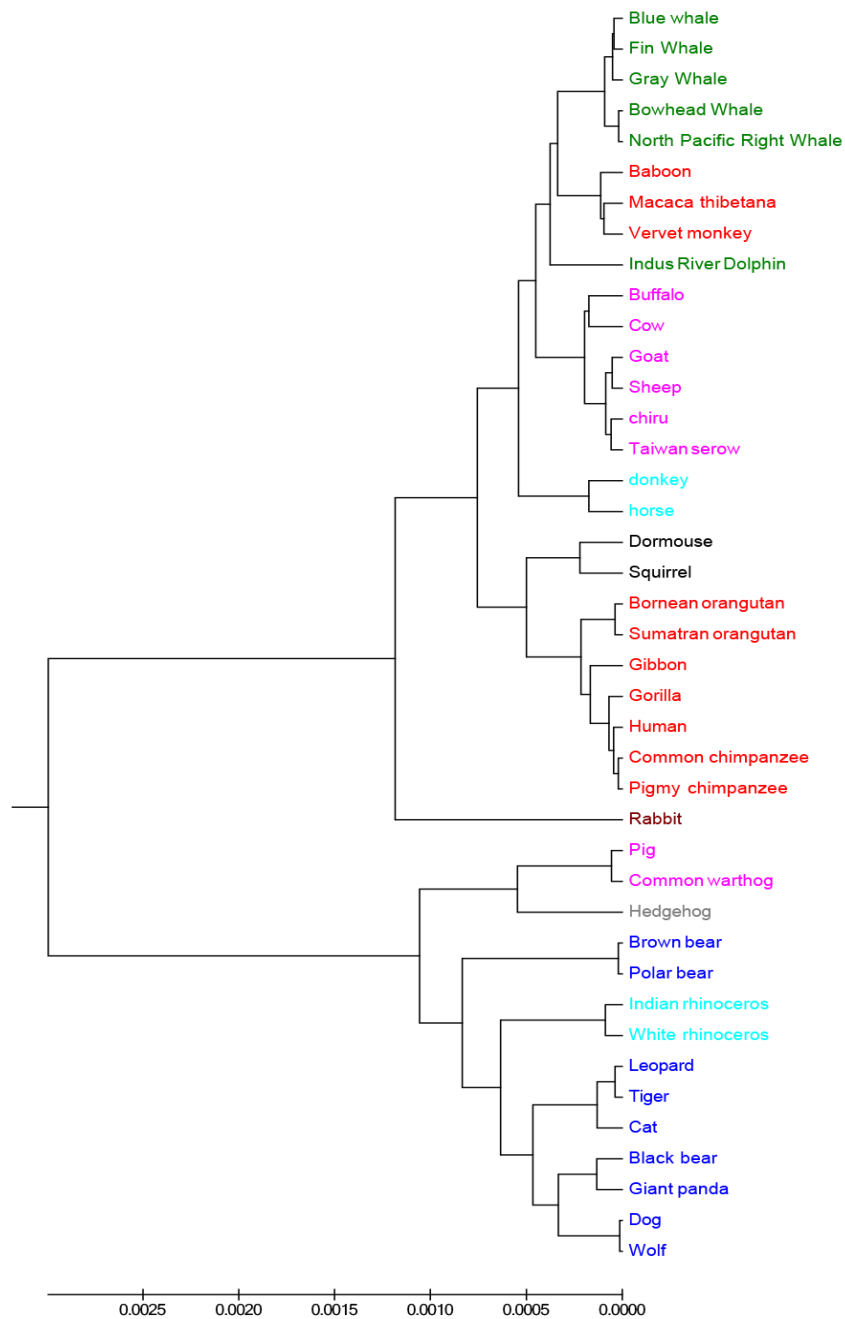

**Figure S2. The UPGMA phylogenetic tree of 38 influenza A viruses based on feature frequency profiles method using 5 mer.**

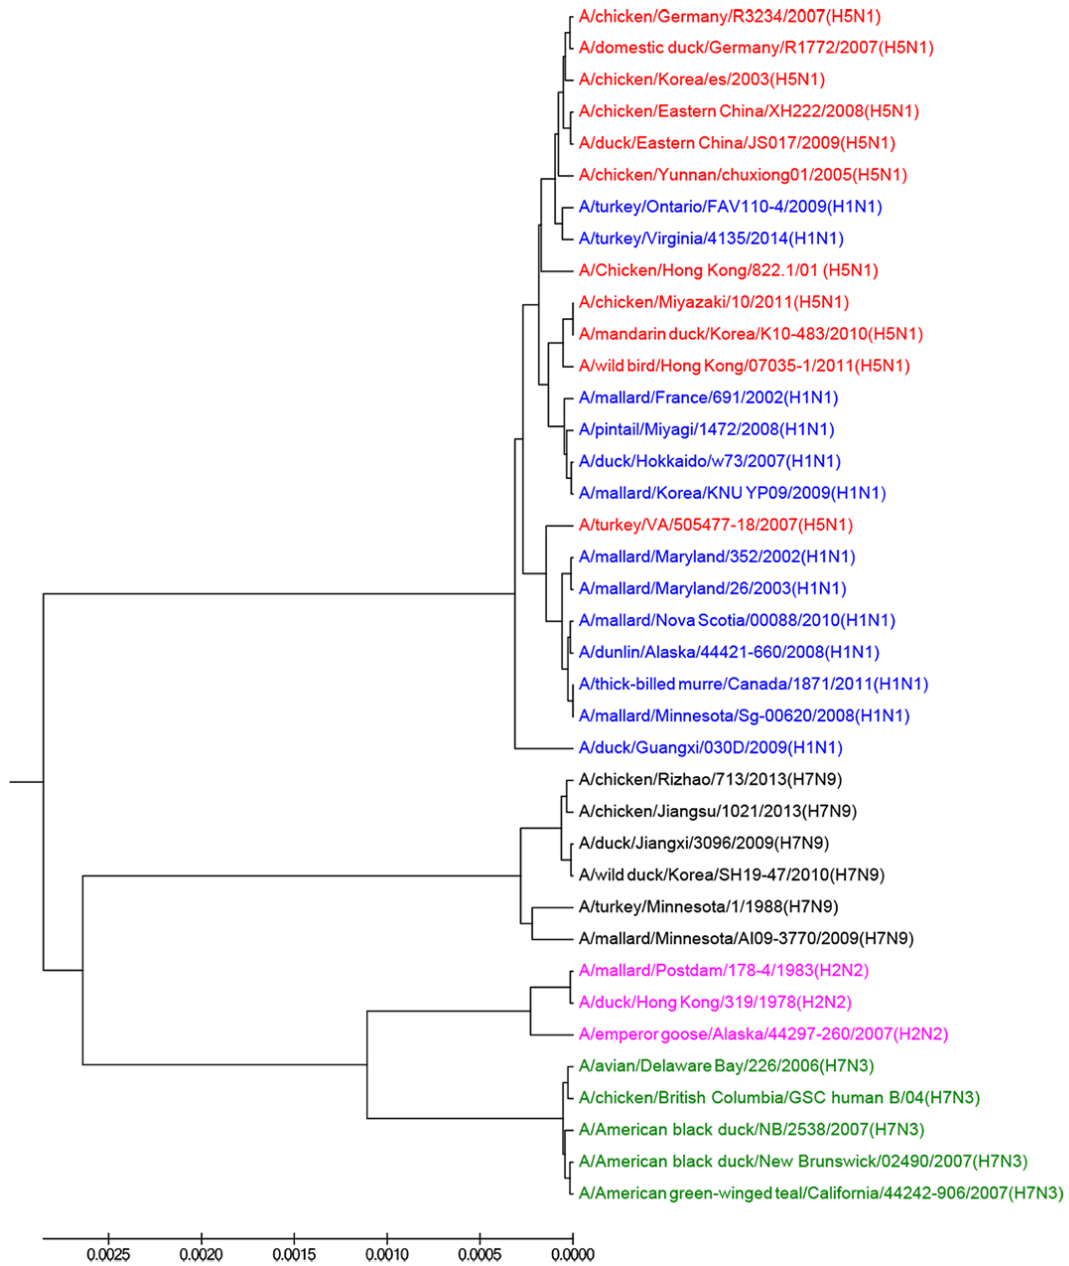

Figure S3. The UPGMA phylogenetic tree of human rhinoviruses based on feature frequency profiles method using 6 mer.

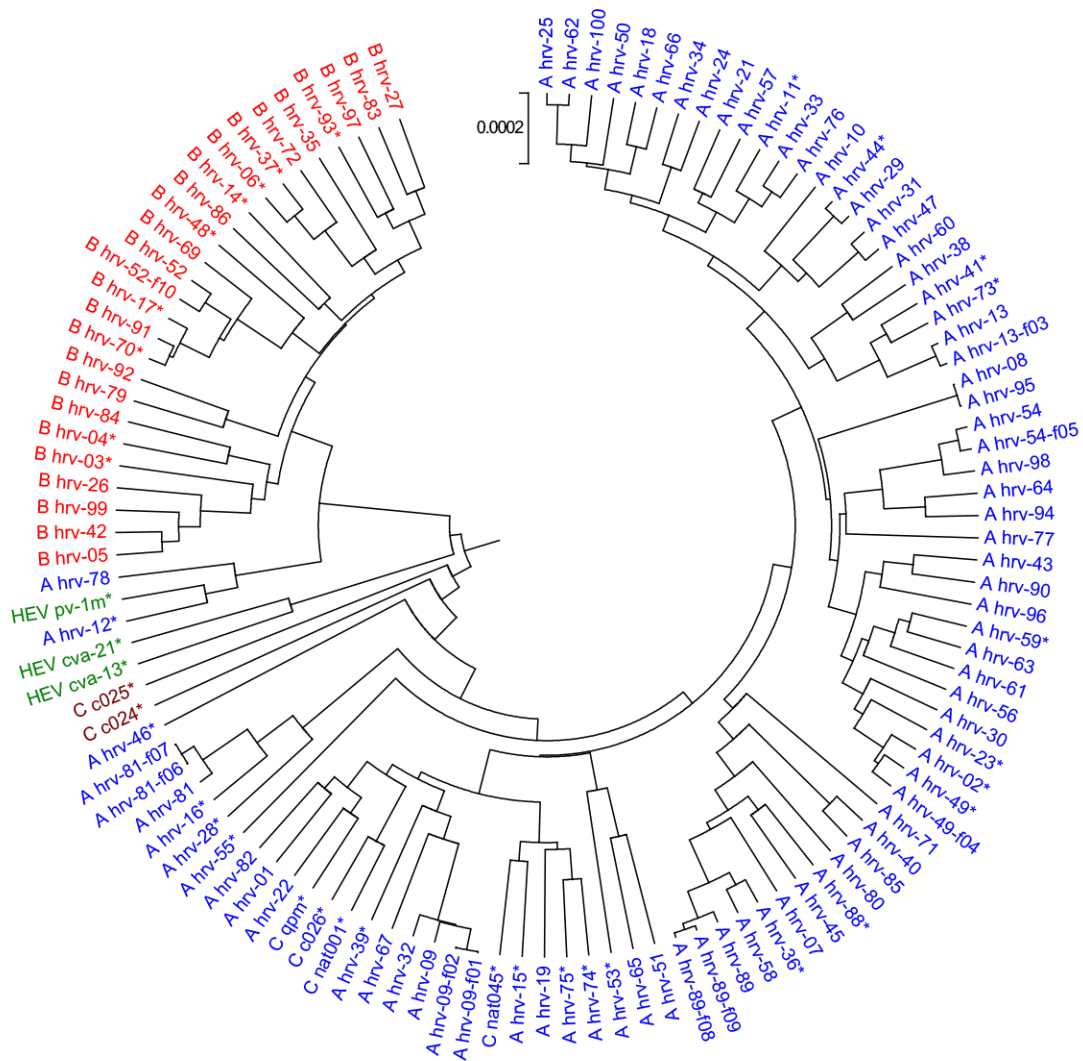

Figure S4. The UPGMA phylogenetic tree of 59 viruses in Ebolavirus genus based on feature frequency profiles method using 7 mer.

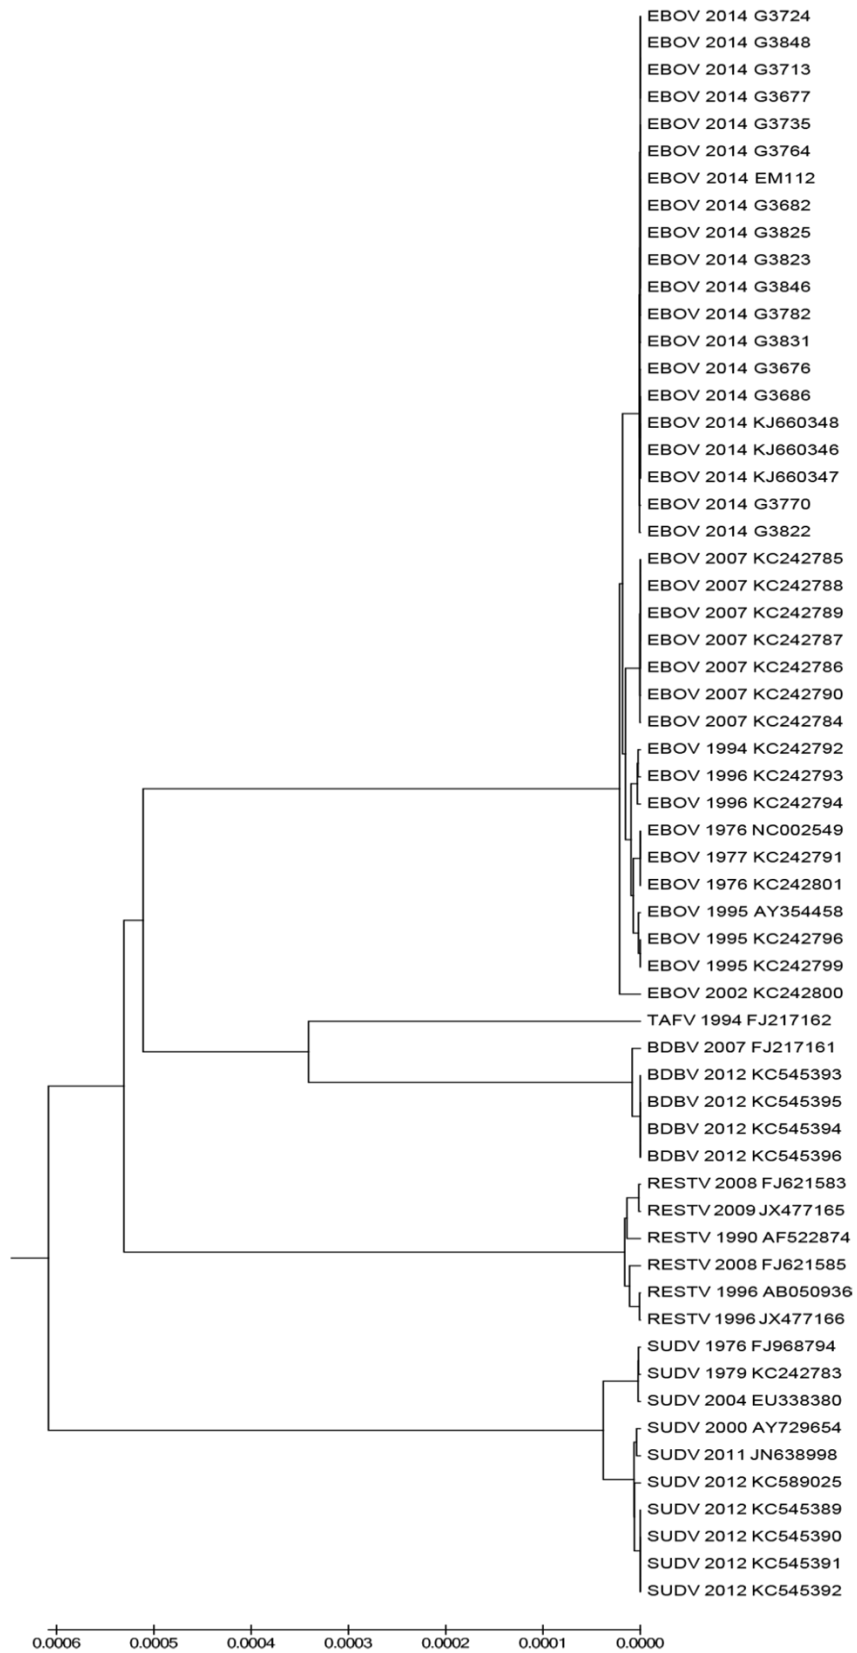

Figure S5. The UPGMA phylogenetic tree of coronaviruses based on feature frequency profiles method using 6 mer.

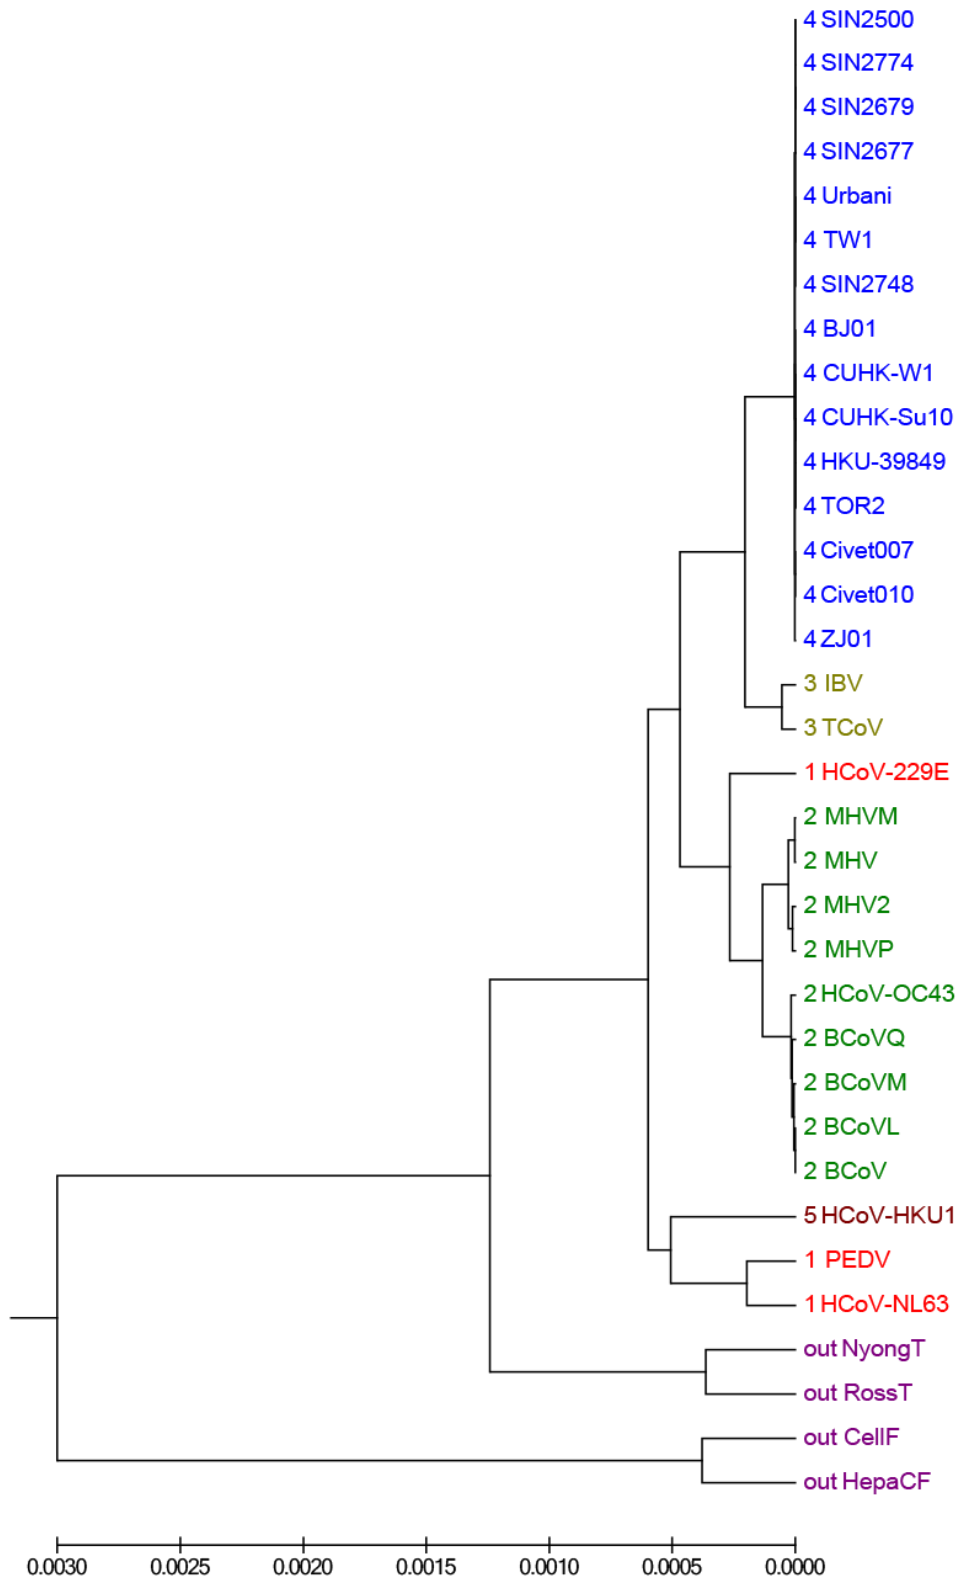

**Figure S6. The UPGMA phylogenetic tree of 59 bacteria from 15 families based on feature frequency profiles method using 9-mer.**

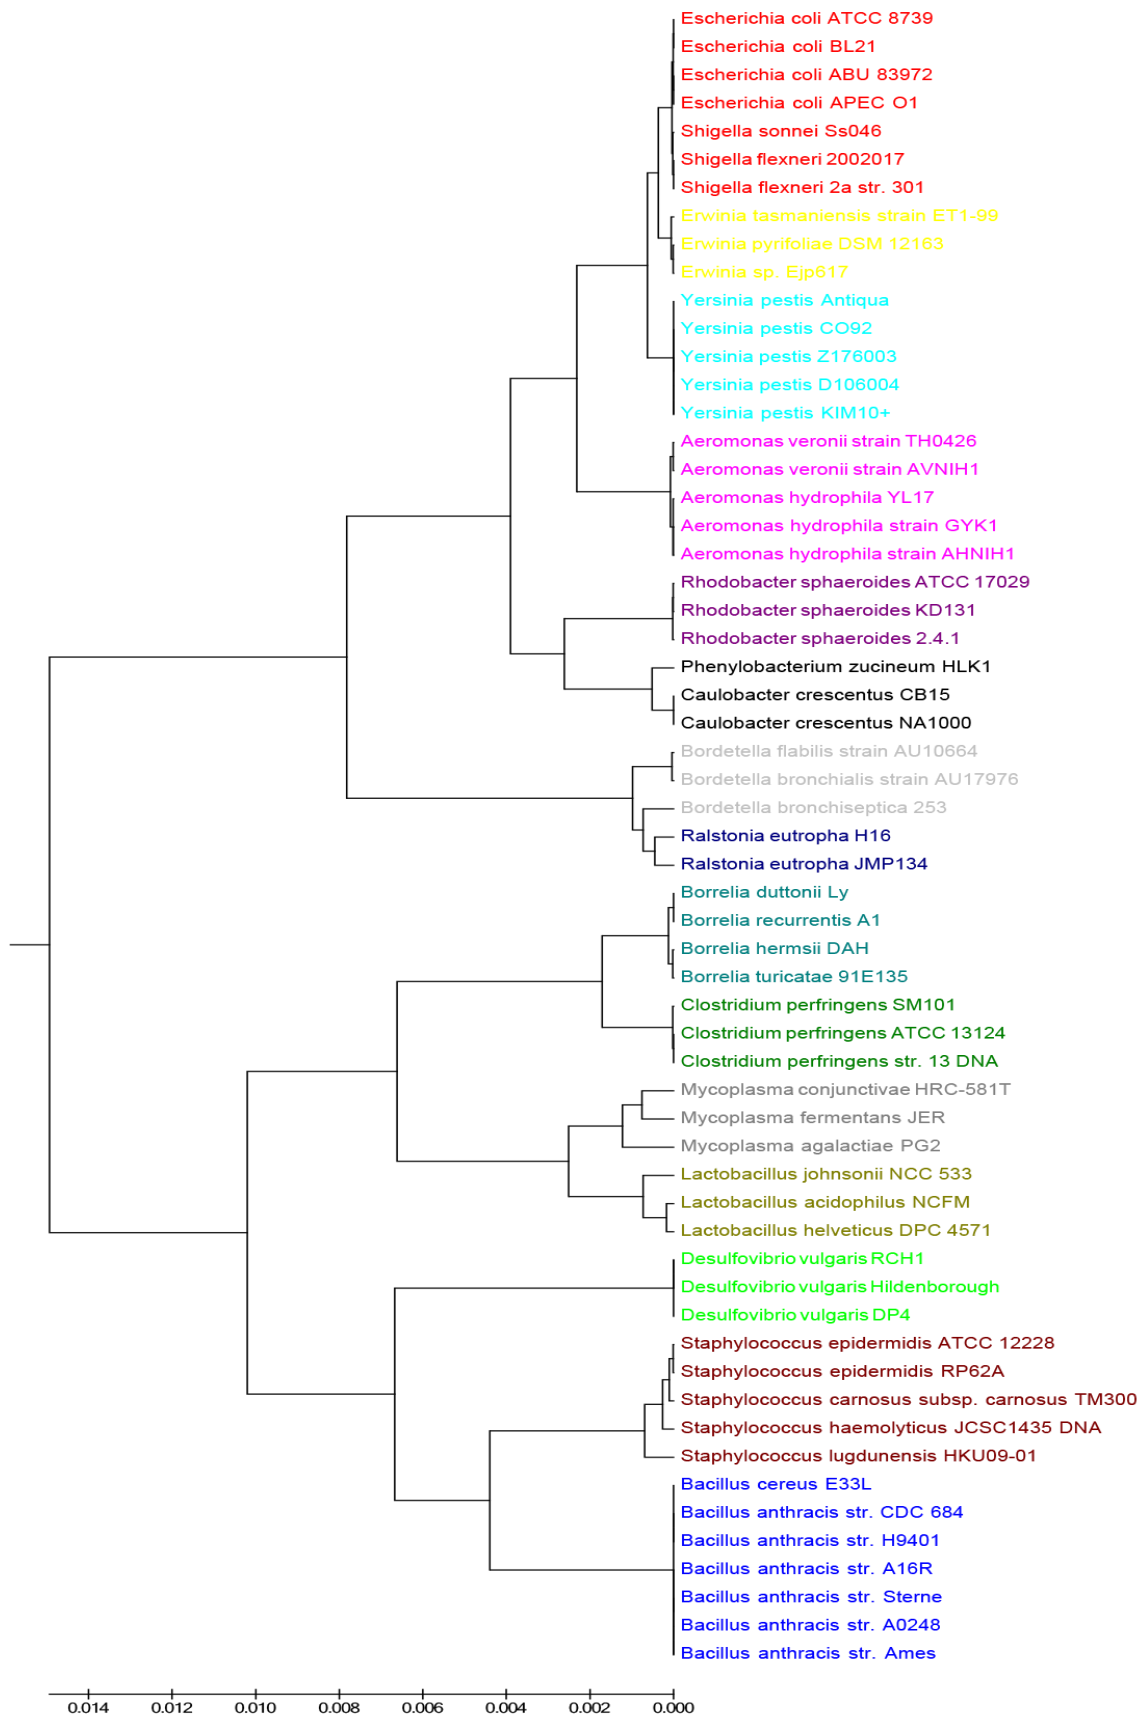



**Figure S8. The UPGMA phylogenetic tree of 9 mammals based on our multiple encoding vector method.**

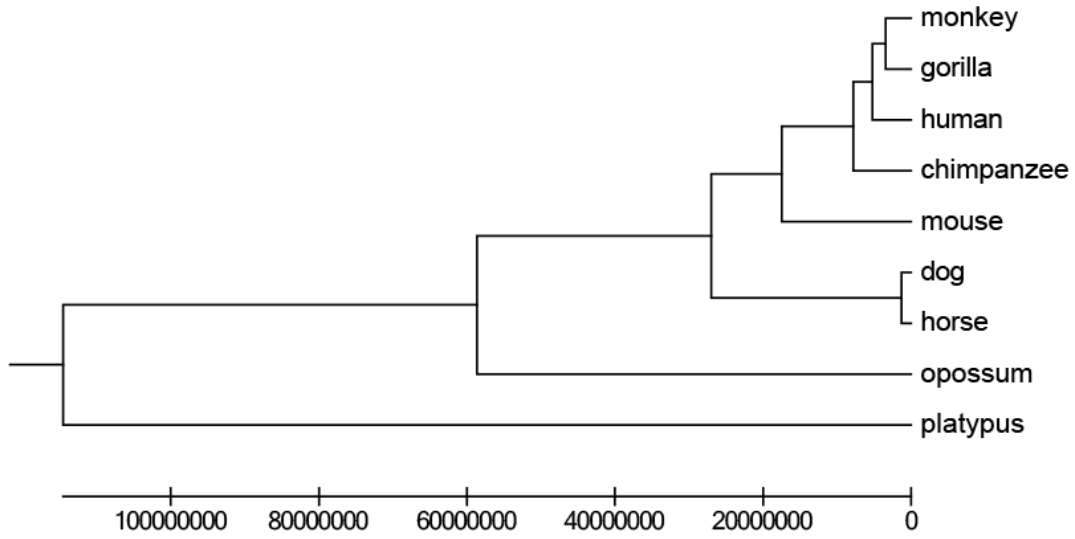

## Phylogenetic trees with the ClustalW method

Figure S7. The UPGMA phylogenetic tree of 38 Influenza A viruses based on ClustalW.

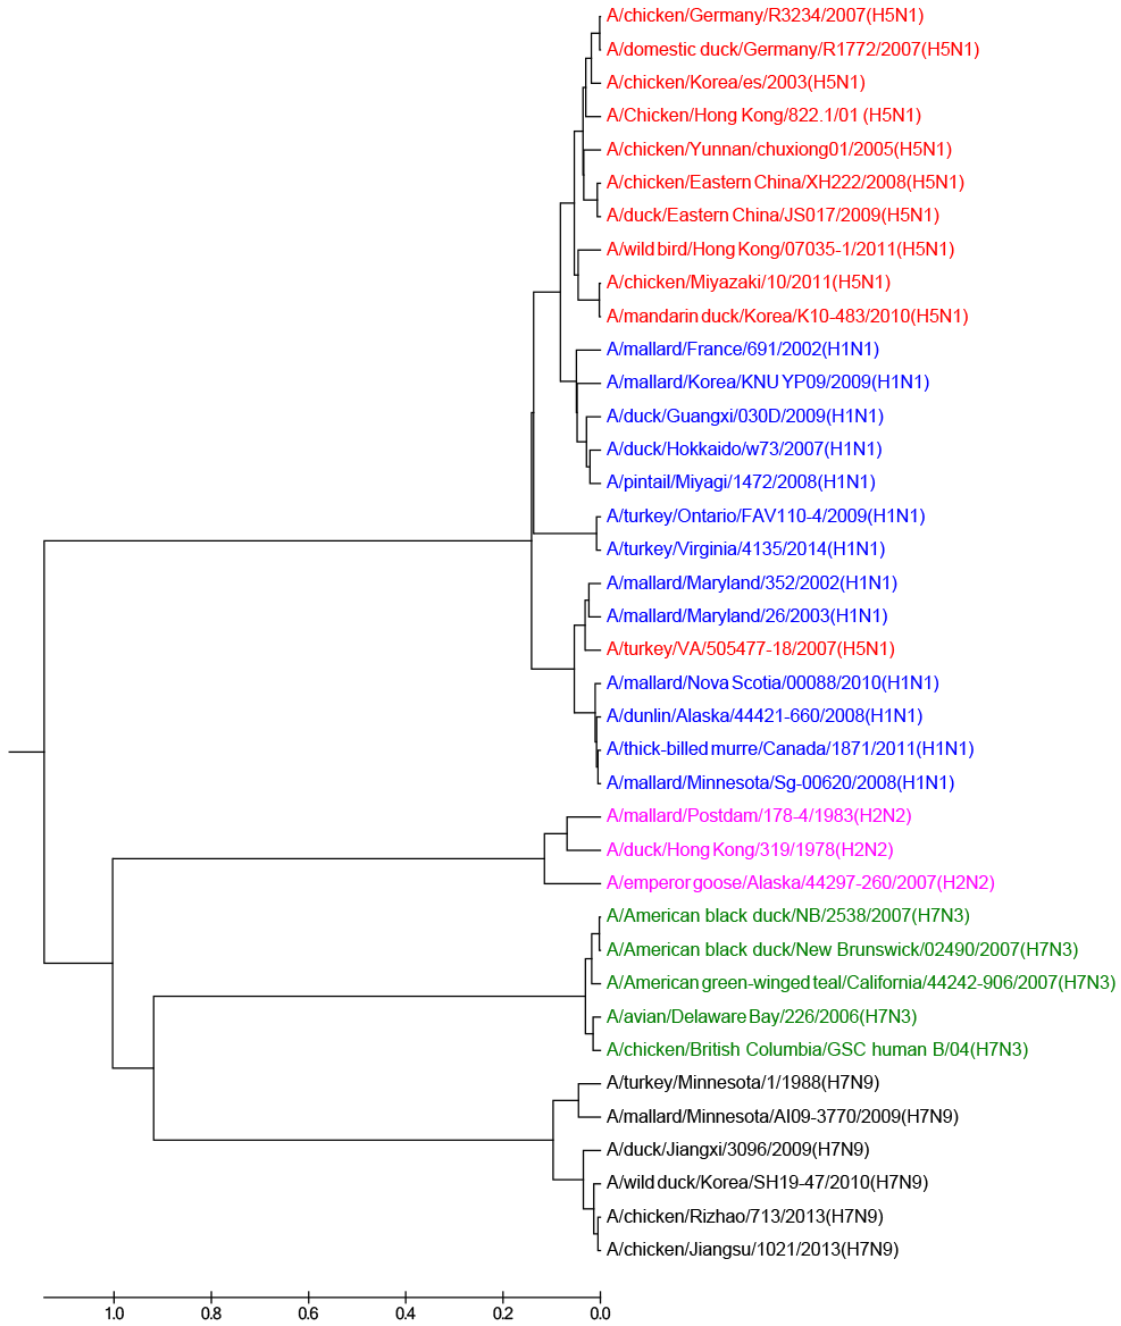

Figure M1. 41 mammalian mitochondrial genomes based on UPGMA algorithm with ClustalW

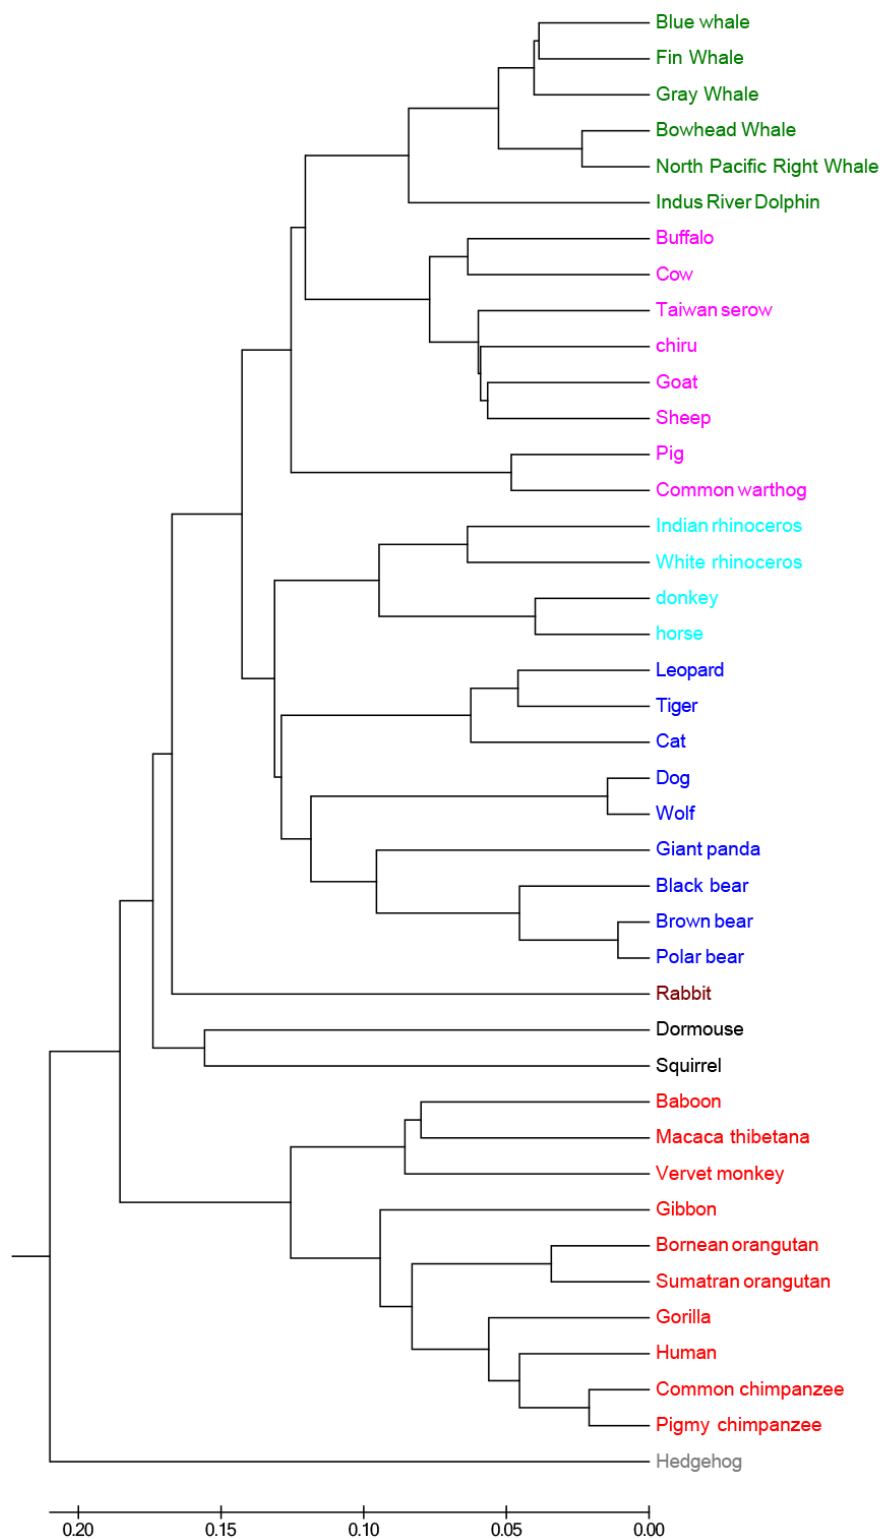

**Figure M2. UPGMA tree of 38 Influenza A viruses by ClustalW**

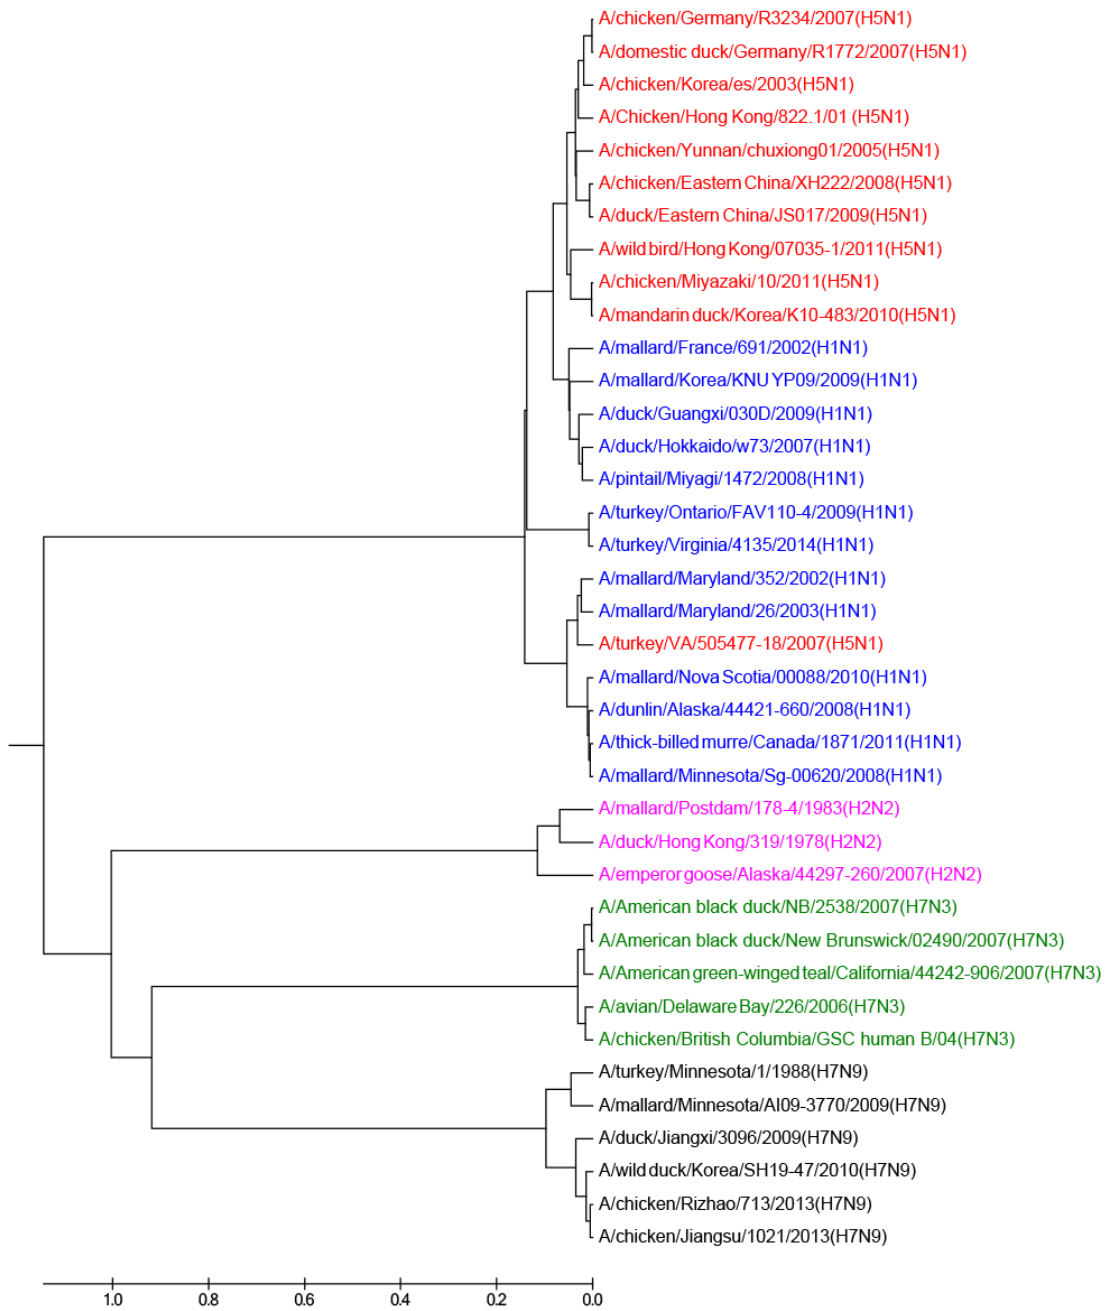

Figure M3. UPGMA phylogenetic tree of 113 HRV viruses and 3 outgroup by ClustalW

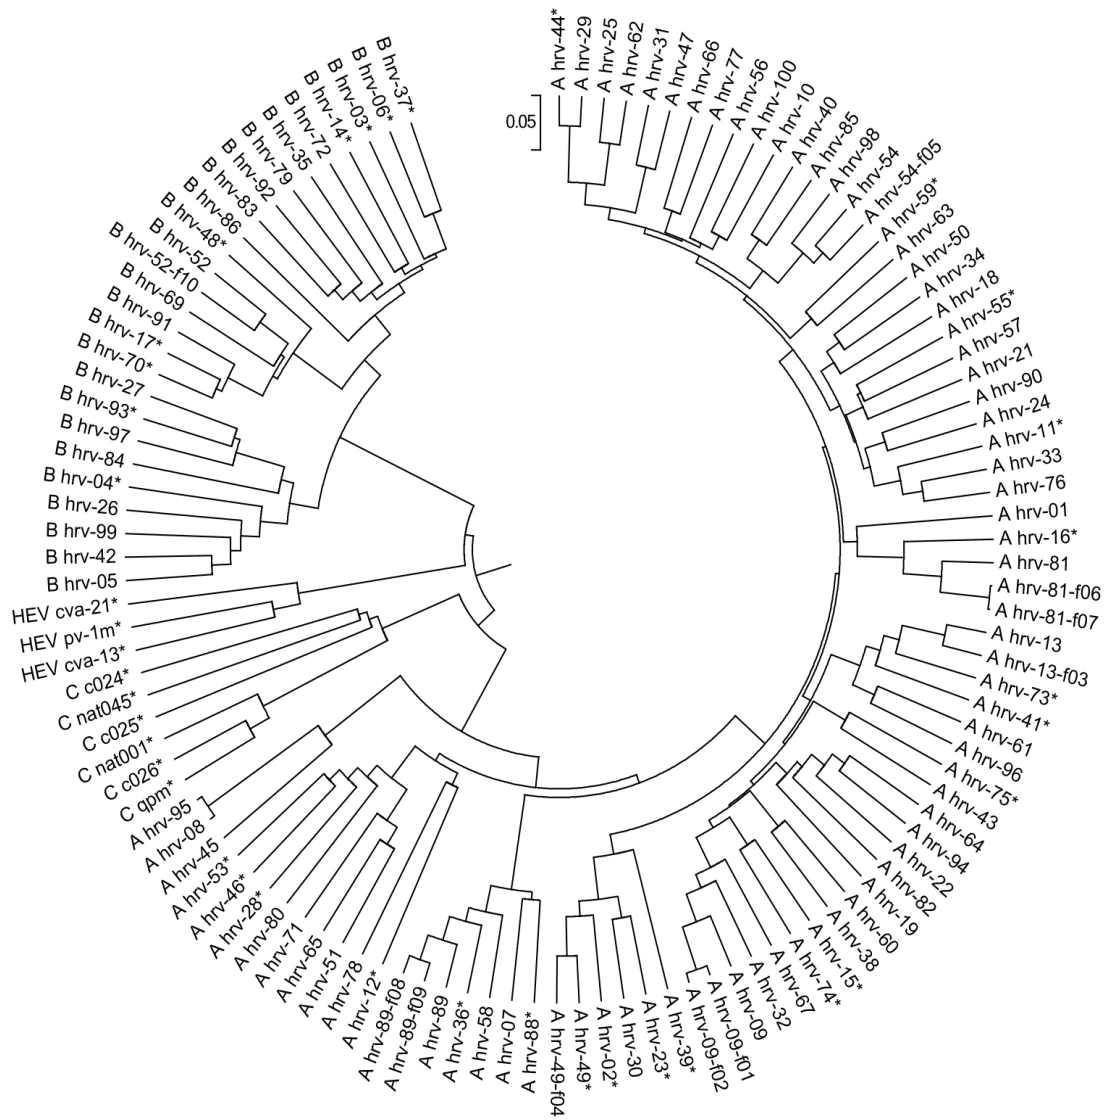

Figure M4. UPGMA phylogenetic tree of 59 ebolarviruses by ClustalW

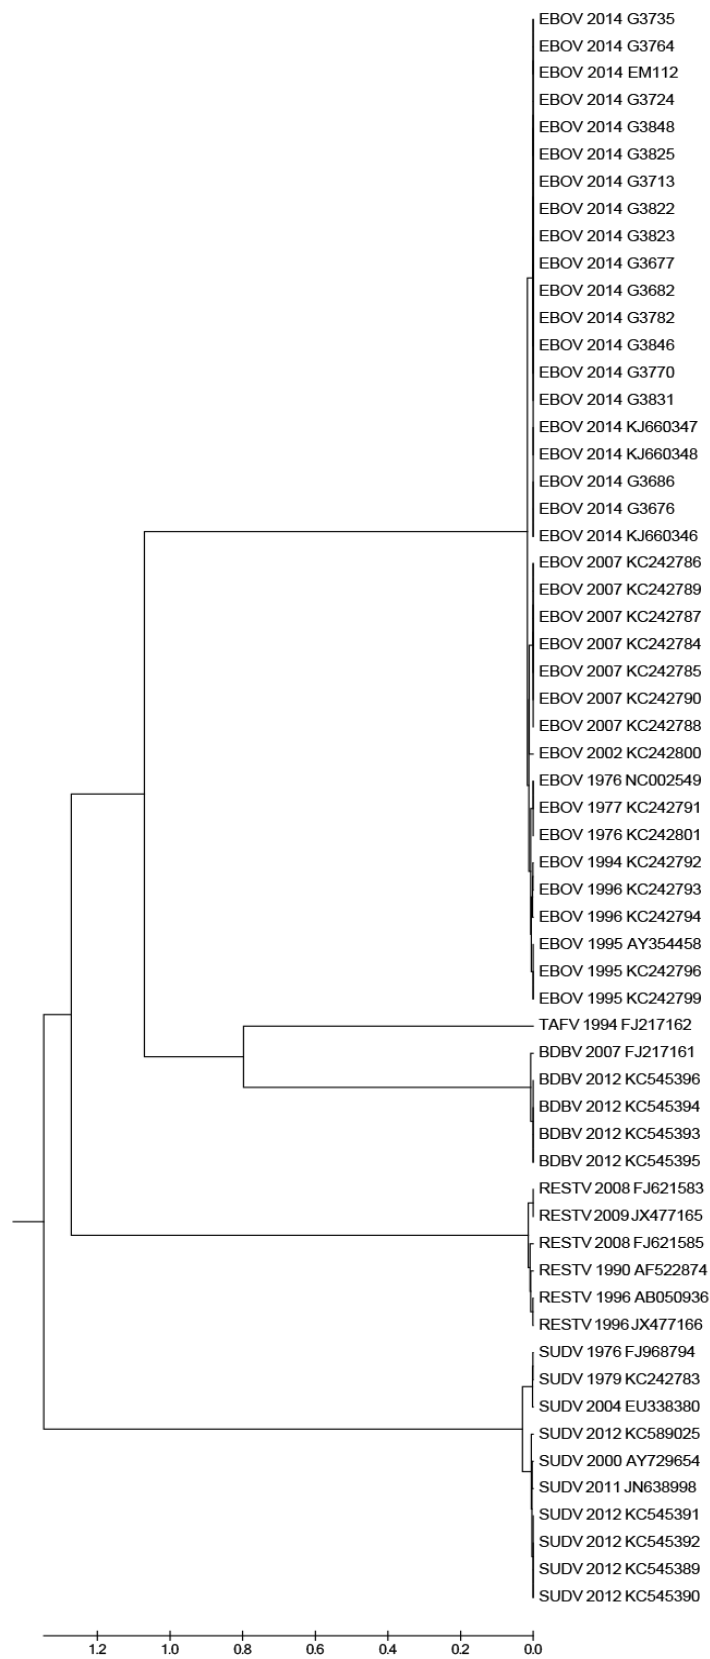

Figure M5. UPGMA phylogenetic tree of 30 coronaviruses and 4 extra non-coronaviruses by ClustalW

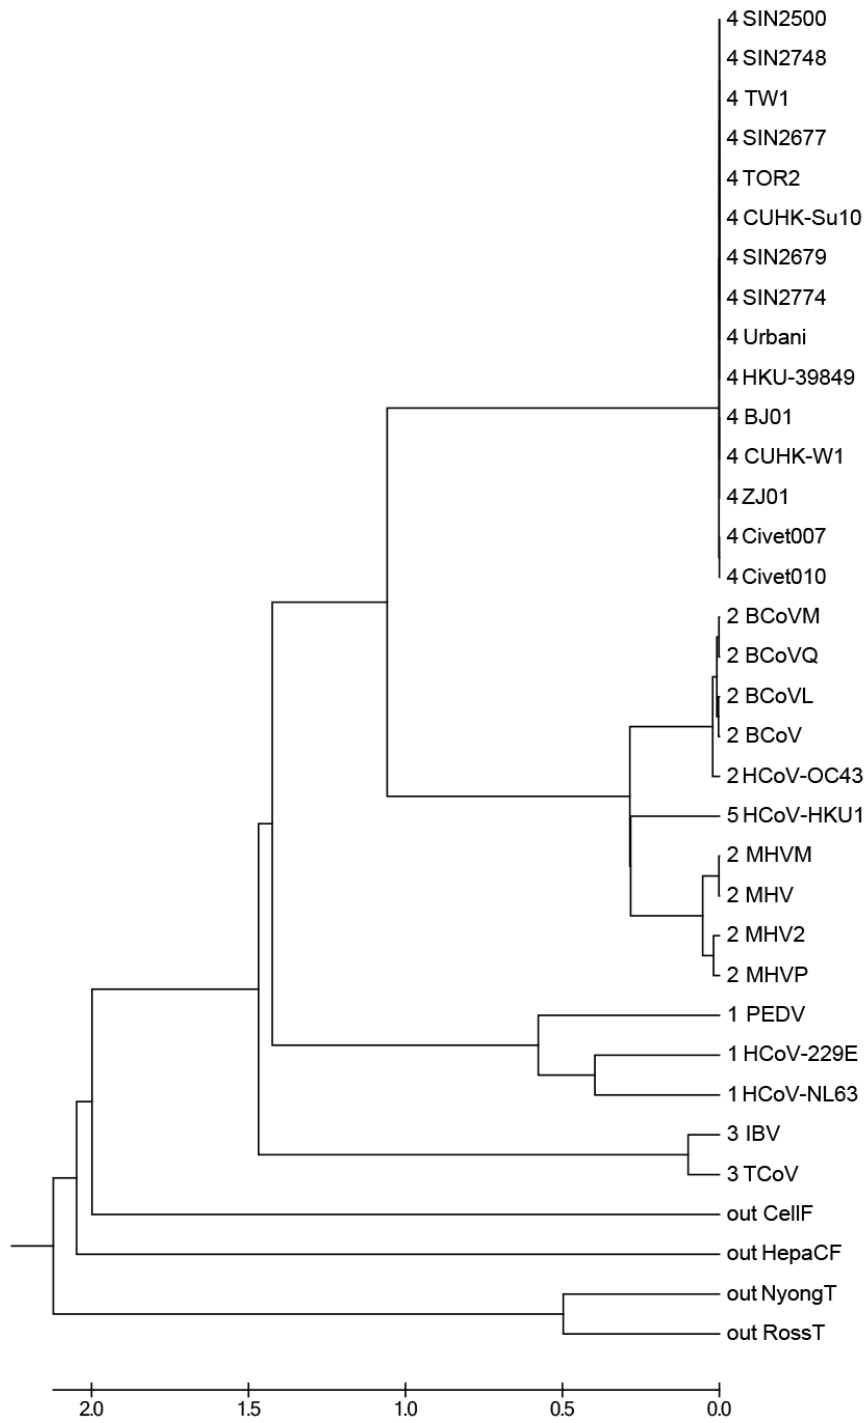

Supplement: 41598_2017_12493_MOESM1_ESM.pdf [file 41598_2017_12493_MOESM1_ESM.pdf]
